# Supplementary material for: Similar Shift Patterns in Gut Bacterial and Fungal Communities Across the Life Stages of Bactrocera minax Larvae From Two Field Populations
Source: Front Microbiol. 2019 Oct 9;10:2262. doi: 10.3389/fmicb.2019.02262 (PMC6794421; doi:10.3389/fmicb.2019.02262)
Supplement: DATA SHEET S2 — The relative abundance of KEGG pathways in larvae predicted by PICRUSt. [file Table_4.XLSX]

## Sheet: Sheet1
L2	ZG-Bm1.1	ZG-Bm1.2	ZG-Bm1.3	ZG-Bm1.4	ZG-Bm2.1	ZG-Bm2.2	ZG-Bm2.3	ZG-Bm2.4	ZG-Bm3.1	ZG-Bm3.2	ZG-Bm3.3	ZG-Bm3.4	DJK-Bm1.1	DJK-Bm1.2	DJK-Bm1.3	DJK-Bm1.4	DJK-Bm2.1	DJK-Bm2.2	DJK-Bm2.3	DJK-Bm2.4	DJK-Bm3.1	DJK-Bm3.2	DJK-Bm3.3	DJK-Bm3.4
Cellular Processes; Cell Communication	9.14361e-08	3.12382e-07	1.45797e-06	9.82145e-08	0	0	0	0	0	0	0	0	0	0	0	0	0	0	0	0	3.17378e-08	1.16704e-07	0	0
Cellular Processes; Cell Growth and Death	0.00596383	0.00640223	0.00610999	0.00608603	0.0042014	0.00416471	0.00518056	0.00357101	0.0039562	0.00341976	0.0037236	0.0036675	0.00408128	0.00317802	0.00384987	0.0050276	0.00537516	0.00518431	0.00617526	0.00655285	0.00546925	0.00536633	0.00520175	0.00623525
Cellular Processes; Cell Motility	0.0263424	0.0230886	0.0273228	0.0251629	0.0335358	0.0333299	0.028857	0.0328176	0.0376753	0.0331589	0.0277988	0.0304752	0.0323397	0.033353	0.0340768	0.0244555	0.0234156	0.0254323	0.0206006	0.019722	0.0190883	0.0215197	0.021924	0.0155702
Cellular Processes; Transport and Catabolism	0.00245448	0.00250695	0.00259901	0.00243641	0.00184534	0.00184736	0.00235625	0.00232107	0.00242866	0.00197006	0.00177608	0.00190685	0.00198863	0.00175722	0.00207075	0.00193059	0.00196036	0.00207803	0.00203903	0.00206363	0.00170492	0.00178472	0.00171232	0.00184784
Environmental Information Processing; Membrane Transport	0.12598	0.12878	0.123329	0.122944	0.149944	0.15058	0.138658	0.131536	0.122986	0.146047	0.148721	0.147458	0.150751	0.159974	0.140852	0.136961	0.12919	0.122565	0.105294	0.105447	0.122123	0.119459	0.126139	0.106828
Environmental Information Processing; Signaling Molecules and Interaction	0.00146027	0.00159799	0.00150491	0.00150789	0.00133849	0.00138306	0.00137187	0.000943009	0.00154127	0.0014025	0.00139678	0.00144115	0.00117988	0.00122488	0.000873842	0.00141458	0.00140391	0.00124332	0.00192968	0.00209638	0.0019713	0.00200253	0.00195067	0.00212654
Environmental Information Processing; Signal Transduction	0.0241644	0.0223017	0.0238118	0.0236811	0.0260694	0.0260458	0.0251693	0.0277139	0.0261236	0.0265921	0.0258286	0.0261468	0.0265342	0.0278804	0.0265564	0.0249667	0.0246562	0.0245759	0.0211254	0.0200336	0.0218012	0.0215939	0.0222655	0.019973
Genetic Information Processing; Folding, Sorting and Degradation	0.0241156	0.0250447	0.0238017	0.0246242	0.0250384	0.0248527	0.0247177	0.0251876	0.0259271	0.0241297	0.0242158	0.0239535	0.024856	0.0236094	0.0260461	0.0263037	0.0274673	0.027909	0.0281652	0.0280661	0.0266225	0.0261614	0.0260136	0.0275762
Genetic Information Processing; Replication and Repair	0.0672304	0.0682809	0.0676101	0.0688422	0.0694065	0.0697384	0.0687923	0.0724012	0.0727188	0.0666082	0.0662121	0.0662526	0.0689907	0.0659742	0.0750102	0.0695105	0.0716054	0.0752884	0.0757912	0.075152	0.0716279	0.0719845	0.0718113	0.0743108
Genetic Information Processing; Transcription	0.0215463	0.0203001	0.0217284	0.0212581	0.0248336	0.0256227	0.0233139	0.0265216	0.0263519	0.0285342	0.0275706	0.0280224	0.0260704	0.029065	0.0269867	0.0223506	0.0208466	0.0219746	0.0198375	0.0190806	0.0224353	0.0232125	0.0233458	0.0201588
Genetic Information Processing; Translation	0.0397553	0.0410002	0.0402848	0.0411489	0.0396302	0.0405826	0.040605	0.0412076	0.0425204	0.038583	0.0387304	0.0386143	0.0406172	0.0385529	0.043264	0.0419434	0.0434233	0.0448318	0.0468549	0.0468467	0.0446651	0.0444691	0.0445187	0.0466555
Human Diseases; Cancers	0.00154914	0.00149543	0.00157765	0.00152278	0.00135891	0.00140418	0.00154896	0.00175158	0.00148712	0.00126408	0.00130171	0.00131276	0.00133951	0.00119622	0.00143698	0.00131669	0.00136225	0.00142728	0.00162453	0.00159624	0.00161473	0.00160663	0.00143986	0.00180779
Human Diseases; Cardiovascular Diseases	0.000160318	0.000152911	0.000186588	0.000150727	4.70185e-06	2.11997e-05	0.000114801	2.35677e-06	2.15708e-05	4.73151e-06	2.87368e-05	3.99043e-05	3.95893e-05	1.17942e-05	2.516e-05	1.95723e-05	9.7926e-06	9.4053e-06	4.61624e-05	7.19013e-05	0.000110003	9.00178e-05	6.19484e-05	0.000135614
Human Diseases; Immune System Diseases	0.000413657	0.000349478	0.000425124	0.000421733	0.000432689	0.000446603	0.000408485	0.000512372	0.000462527	0.000412561	0.000393774	0.000400165	0.000464241	0.000469231	0.000535395	0.000398251	0.000401601	0.000453781	0.000355011	0.000323863	0.000320076	0.000334007	0.000376002	0.000285736
Human Diseases; Infectious Diseases	0.00524158	0.00559813	0.00488536	0.00529039	0.00645387	0.00644183	0.00637241	0.00796473	0.00619648	0.00613595	0.00620995	0.00611989	0.0065134	0.00671272	0.00687491	0.00664959	0.00685466	0.00708563	0.00620965	0.0057443	0.00560922	0.00533132	0.00589118	0.00526345
Human Diseases; Metabolic Diseases	0.00116407	0.00121298	0.00110061	0.00120057	0.00101501	0.000946975	0.00107232	0.00111225	0.00090182	0.000748498	0.000816731	0.000759677	0.0010305	0.00082279	0.00110501	0.00127447	0.00141743	0.00143743	0.001284	0.00124346	0.00100485	0.000903135	0.00101082	0.00110218
Human Diseases; Neurodegenerative Diseases	0.00336616	0.00283045	0.00359313	0.00320497	0.00133568	0.00172162	0.00249463	0.00176738	0.00276236	0.00225489	0.00234792	0.00245759	0.0020834	0.00185516	0.00217051	0.00151828	0.00136065	0.00160858	0.00277522	0.00310804	0.00364042	0.00376005	0.00298327	0.00419828
Metabolism; Amino Acid Metabolism	0.0966284	0.0941643	0.100337	0.0967375	0.0840035	0.0849381	0.0889647	0.0875	0.0910625	0.0867818	0.0858343	0.0870569	0.0833097	0.0824488	0.0820732	0.0827945	0.0819802	0.0818656	0.0914141	0.0933705	0.0920996	0.093793	0.0900627	0.0942721
Metabolism; Biosynthesis of Other Secondary Metabolites	0.00907107	0.00987342	0.00925555	0.00936741	0.00782487	0.00743462	0.00814114	0.006214	0.00738543	0.00714983	0.0070991	0.00709888	0.00679986	0.00610205	0.00585325	0.00867243	0.00903581	0.00827832	0.00951228	0.00995243	0.00832874	0.00837232	0.00825125	0.00897835
Metabolism; Carbohydrate Metabolism	0.0922306	0.0903365	0.0930753	0.0918324	0.0894316	0.0907361	0.0914573	0.0875255	0.0904314	0.0987513	0.0995449	0.0995605	0.0912329	0.0963614	0.0880589	0.0902203	0.0870783	0.0850977	0.0902672	0.0912845	0.0961265	0.0994699	0.0967233	0.0969633
Metabolism; Energy Metabolism	0.0669445	0.0784741	0.0642527	0.0701522	0.0633503	0.0593334	0.0672284	0.0562279	0.0555174	0.0523029	0.0555979	0.0531378	0.0589658	0.0498887	0.0549338	0.0788646	0.0857388	0.0807288	0.0791295	0.0802032	0.0663166	0.0602212	0.064144	0.0698911
Metabolism; Enzyme Families	0.0214121	0.0230413	0.0207736	0.022004	0.0232555	0.0223659	0.0219505	0.0210249	0.0211818	0.0214539	0.021574	0.0213105	0.0213429	0.0209643	0.0204817	0.0245566	0.025464	0.0245524	0.0243538	0.0242706	0.0220277	0.0214807	0.0223698	0.0221263
Metabolism; Glycan Biosynthesis and Metabolism	0.0188293	0.0181689	0.0184237	0.0186093	0.0241832	0.024073	0.0218478	0.0277942	0.0252228	0.0241402	0.0235765	0.0237908	0.0245102	0.0253573	0.0276376	0.0220239	0.0218978	0.024012	0.0220632	0.0208291	0.0220632	0.0230448	0.0225211	0.0219442
Metabolism; Lipid Metabolism	0.0348088	0.0326514	0.0361811	0.0344083	0.0269175	0.0274445	0.0304642	0.0295296	0.0311488	0.0289572	0.0284244	0.0290522	0.0282448	0.0272092	0.0287019	0.0276096	0.027063	0.0276603	0.0308008	0.0315115	0.0300427	0.0322398	0.0298605	0.0320106
Metabolism; Metabolism of Cofactors and Vitamins	0.0453658	0.0494597	0.0444479	0.0466181	0.0441985	0.0424878	0.0461466	0.0434899	0.0428106	0.0399623	0.041786	0.0403586	0.0436385	0.0390979	0.0440552	0.0503703	0.0534547	0.052637	0.0527209	0.0530195	0.048639	0.0463025	0.0466575	0.0510538
Metabolism; Metabolism of Other Amino Acids	0.0187141	0.0181216	0.0191251	0.0185033	0.0170608	0.0172166	0.0177481	0.017756	0.0178686	0.0175505	0.0175693	0.0177292	0.0168376	0.0170425	0.0166512	0.0165307	0.016106	0.0162285	0.017983	0.0182095	0.0184699	0.0191696	0.0182013	0.018869
Metabolism; Metabolism of Terpenoids and Polyketides	0.0204846	0.0207274	0.0210883	0.0207954	0.016971	0.0165269	0.0177919	0.0155869	0.0160369	0.0150076	0.015425	0.0153397	0.015374	0.0140402	0.0146259	0.0178171	0.0183585	0.0178138	0.0193827	0.019954	0.0177363	0.0176503	0.0174716	0.0189923
Metabolism; Nucleotide Metabolism	0.0308124	0.030849	0.0309376	0.0313411	0.0316924	0.0319704	0.0319234	0.0349394	0.0328715	0.0307737	0.0311243	0.0309064	0.0321813	0.0312169	0.0347353	0.0318775	0.0324982	0.0341293	0.0354238	0.0348315	0.0344509	0.0348136	0.0344826	0.0357708
Metabolism; Xenobiotics Biodegradation and Metabolism	0.0375787	0.0327219	0.0395884	0.0364328	0.0207855	0.0212439	0.0257308	0.0183242	0.024276	0.0218861	0.0221671	0.0224295	0.0207843	0.0188636	0.0187473	0.0216551	0.021121	0.0201544	0.0269984	0.0295128	0.0273572	0.028947	0.0262733	0.0307683
Organismal Systems; Circulatory System	0.000451847	0.000333859	0.000504551	0.000428084	2.7737e-05	0.000105785	0.000201579	5.06455e-06	0.000389737	0.000225929	0.000222806	0.000249669	9.89581e-05	3.29125e-05	5.07969e-05	3.9168e-05	2.55185e-05	2.26536e-05	0.000465913	0.000565685	0.000638375	0.000677585	0.000472927	0.000792707
Organismal Systems; Digestive System	0.000663369	0.000901067	0.000590064	0.000705475	0.000583781	0.000520503	0.000577502	0.000158255	0.000313824	0.000453787	0.000515745	0.000486369	0.000443643	0.000373587	0.000192973	0.000846465	0.00089853	0.000745041	0.000816569	0.000896769	0.000646785	0.000574768	0.000645187	0.000684254
Organismal Systems; Endocrine System	0.00405669	0.00412675	0.00412722	0.00414236	0.00275418	0.00247818	0.00314744	0.00238064	0.00243086	0.00193449	0.00184132	0.00184242	0.00223296	0.00153861	0.00193938	0.00333845	0.00372463	0.00336936	0.00314313	0.00321359	0.00200862	0.00184183	0.00205523	0.00231105
Organismal Systems; Environmental Adaptation	0.00126194	0.00105718	0.00133673	0.00123786	0.00125599	0.00126501	0.00103059	0.00102956	0.00127461	0.00120706	0.00112556	0.00116985	0.00108083	0.00111293	0.00115366	0.000896663	0.000857732	0.0009289	0.00106698	0.00110823	0.00114047	0.00122858	0.00113285	0.00122381
Organismal Systems; Excretory System	0.000392352	0.000351612	0.000394602	0.000384575	0.000350347	0.000327398	0.000260208	0.000270928	0.000290259	0.000275085	0.00025373	0.00024746	0.000246667	0.000251906	0.000287809	0.000267722	0.000279837	0.000317353	0.000295848	0.000296117	0.000201726	0.000229674	0.000235928	0.000237217
Organismal Systems; Immune System	0.00056986	0.000567755	0.000535929	0.000554323	0.000725271	0.000742629	0.000538195	0.000543862	0.000624225	0.00065286	0.000654336	0.000652168	0.000601272	0.000619729	0.000602488	0.000625209	0.000634917	0.000644381	0.000741402	0.00075736	0.000694963	0.000732863	0.000708658	0.000762406
Organismal Systems; Nervous System	0.000749349	0.000910647	0.000744165	0.000772424	0.000673116	0.00065424	0.000719947	0.000579766	0.000569018	0.000473961	0.000516575	0.000495312	0.000637039	0.000514316	0.000624746	0.000762825	0.000818351	0.000826284	0.000799279	0.00082668	0.000614984	0.00058531	0.000633632	0.000704707
Organismal Systems; Sensory System	3.04787e-08	1.04127e-07	1.90169e-07	3.27382e-08	0	0	0	0	0	0	0	0	0	0	0	0	0	0	0	0	0	3.89014e-08	0	0
Unclassified; Cellular Processes and Signaling	0.038082	0.0355355	0.0369082	0.0369143	0.0456545	0.0471597	0.0438846	0.0541102	0.0527273	0.0549405	0.0535604	0.054013	0.0498131	0.055285	0.052449	0.0430438	0.0411618	0.0437165	0.0431229	0.0412501	0.0483708	0.0496287	0.0481935	0.0458344
Unclassified; Genetic Information Processing	0.0282059	0.0284913	0.0267447	0.0276476	0.0297764	0.0289056	0.0281895	0.0301068	0.0276716	0.0264858	0.0275668	0.026873	0.0285712	0.0272286	0.0298798	0.0295276	0.0305481	0.0314067	0.0309683	0.0305725	0.0310962	0.029339	0.0302018	0.0334217
Unclassified; Metabolism	0.0295991	0.0269004	0.0289656	0.0289469	0.0265371	0.0273595	0.0266971	0.0280868	0.0270664	0.0306719	0.0310765	0.0309606	0.027891	0.0309186	0.0266877	0.0277101	0.0268935	0.0267765	0.026436	0.0258385	0.0286943	0.0281168	0.0289983	0.0277839
Unclassified; Poorly Characterized	0.0521788	0.0512909	0.0517893	0.0519811	0.0555424	0.0555803	0.0543253	0.0594841	0.0567678	0.0566952	0.0558712	0.0562103	0.0562819	0.0578944	0.0578417	0.0539084	0.05361	0.0549834	0.0519871	0.0505767	0.0524266	0.0519615	0.0530569	0.0505282
